# Supplementary material for: Synthesis of g-C3N4@ZnIn2S4 Heterostructures with Extremely High Photocatalytic Hydrogen Production and Reusability
Source: MDPI journal article supplement (doi:10.3390/catal13081187), 2023-08-04
Supplement: s1 [file s1]

## Supplementary Material:

# Synthesis of g-C<sub>3</sub>N<sub>4</sub>@ZnIn<sub>2</sub>S<sub>4</sub> Heterostructures with Extremely High Photocatalytic Hydrogen Production and Reusability

Yu-Cheng Chang <sup>1,\*</sup>, Yung-Chang Chiao <sup>1</sup> and Chi-Jung Chang <sup>2</sup>

<sup>1</sup> Department of Materials Science and Engineering, Feng Chia University, Taichung 40724, Taiwan; yuchchang@fcu.edu.tw (Chang, Y.-C.), as25874115@gmail.com (Y.-C. Chiao)

<sup>2</sup> Department of Chemical Engineering, Feng Chia University, Taichung 40724, Taiwan; changcj@fcu.edu.tw (C.-J. Chang)

| Materials                                                                              | HER<br>( $\mu\text{mol h}^{-1} \text{g}^{-1} \text{L}^{-1}$ ) | Light<br>sources          | References          |
|----------------------------------------------------------------------------------------|---------------------------------------------------------------|---------------------------|---------------------|
| <b>g-C<sub>3</sub>N<sub>4</sub>@ZnIn<sub>2</sub>S<sub>4</sub><br/>heterostructures</b> | <b>2377.6</b>                                                 | <b>5 W blue<br/>LED</b>   | <b>Present work</b> |
| <b>TiOF<sub>2</sub>/g-C<sub>3</sub>N<sub>4</sub> composite</b>                         | <b>2292</b>                                                   | <b>300 W<br/>Xe lamp</b>  | <b>Ref. 63</b>      |
| <b>TiO<sub>2</sub>/CdS/g-C<sub>3</sub>N<sub>4</sub> ternary<br/>nanocomposite</b>      | <b>1165</b>                                                   | <b>1000 W<br/>Xe lamp</b> | <b>Ref. 25</b>      |
| <b>UiO-66-NH<sub>2</sub>/ZnIn<sub>2</sub>S<sub>4</sub><br/>nanosheets</b>              | <b>417</b>                                                    | <b>300 W<br/>Xe lamp</b>  | <b>Ref. 64</b>      |
| <b>ZnIn<sub>2</sub>S<sub>4</sub>/ZnO<br/>heterostructures</b>                          | <b>631.1</b>                                                  | <b>5 W blue<br/>LED</b>   | <b>Ref. 65</b>      |

**Table S1** List of photocatalytic hydrogen evolution for the g-C<sub>3</sub>N<sub>4</sub>@ZnIn<sub>2</sub>S<sub>4</sub> heterostructures and other similar photocatalysts reported in the literature.

|          | <b>g-C<sub>3</sub>N<sub>4</sub></b> | <b>0.005 g g-C<sub>3</sub>N<sub>4</sub><br/>@ZnIn<sub>2</sub>S<sub>4</sub></b> | <b>0.01 g g-C<sub>3</sub>N<sub>4</sub><br/>@ZnIn<sub>2</sub>S<sub>4</sub></b> | <b>0.025 g g-C<sub>3</sub>N<sub>4</sub><br/>@ZnIn<sub>2</sub>S<sub>4</sub></b> | <b>0.05 g g-C<sub>3</sub>N<sub>4</sub><br/>@ZnIn<sub>2</sub>S<sub>4</sub></b> | <b>ZnIn<sub>2</sub>S<sub>4</sub></b> |
|----------|-------------------------------------|--------------------------------------------------------------------------------|-------------------------------------------------------------------------------|--------------------------------------------------------------------------------|-------------------------------------------------------------------------------|--------------------------------------|
| <b>Ω</b> | <b>1147500</b>                      | <b>575240</b>                                                                  | <b>349080</b>                                                                 | <b>584420</b>                                                                  | <b>824900</b>                                                                 | <b>669760</b>                        |

**Table S2** The charge transfer resistance values of g-C<sub>3</sub>N<sub>4</sub> nanostructures, g-C<sub>3</sub>N<sub>4</sub>@ZnIn<sub>2</sub>S<sub>4</sub> heterostructures with different weights of g-C<sub>3</sub>N<sub>4</sub> nanostructures, and ZnIn<sub>2</sub>S<sub>4</sub> nanostructures.
